# Supplementary material for: Visualization of flax cell wall lignification using a novel click chemistry analogue of sinapyl alcohol
Source: Royal Society of Chemistry journal article supplement (doi:10.1039/d4nj02847c), 2024-01-01
Supplement: d4nj02847c1.pdf [file d4nj02847c1.pdf]

**Supplementary Information**

**Visualization of flax cell wall lignification using a novel click chemistry analogue of sinapyl alcohol**

Haitao Yang,<sup>a,1,\*</sup> Wei Liu,<sup>a,1</sup> Zhiyuan Sun,<sup>b</sup> Lan Yao,<sup>a,b,\*</sup>

Correspondence should be addressed to: [pphtyang1979@aliyun.com](mailto:pphtyang1979@aliyun.com); [yaolislan1982@aliyun.com](mailto:yaolislan1982@aliyun.com)

## Supplementary Methods

### 1.1 FT-IR spectroscopy determination

FT-IR spectroscopy (Nicolet 6700, Thermofisher Nicolet, America) was applied to scan the samples for 64 times from  $4000\text{ cm}^{-1}$  to  $500\text{ cm}^{-1}$ , with  $2\text{ cm}^{-1}$  resolution.

### 1.2 UV spectroscopy determination

5 mg of lignin dehydrogenated polymer was dissolved in 10 mL of 95% (V/V) dioxane aqueous solution. Dilute 1 mL of the solution with distilled water to 10 mL. UV spectrophotometer (UV-2550, Shimadzu Co., Ltd., Japan) was employed to scan the solution at the wavelength of 200 nm~450 nm.

## Supplementary Notes

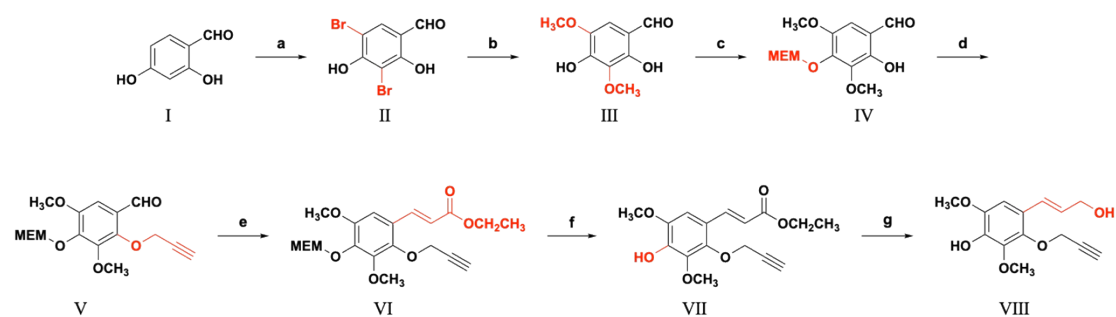

**Fig.S1** Synthesis of 2-O-propargylsinapyl alcohol (2-O-PSA). (a) Bromination. (b) Methoxylation. (c) Protection with DIPEA and 2-methoxyethoxymethyl chloride. (d) Propargylation using propargyl bromide. (e) Wittig olefination with triethyl phosphonoacetate and sodium hydride. (f) Deprotection with trifluoroacetic acid, (g) Selective reduction with DIBAL-H

**(1) 3,5-dibromo-2,4-dihydroxybenzene-1-carbaldehyde (II, CAS:116096-91-4)**

Bromine (6.4 g, 40 mmol) was added dropwise to solution of 2,4-dihydroxybenzaldehyde (2.8 g, 20 mmol) in ethanol (40 mL) at room temperature. After stirring for 30 minutes, the mixture was poured into distilled water (100 mL) and filtered. The filtrate was washed with water and residual bromine present in the aqueous phase was quenched with saturated sodium thiosulfate solution. Compound **2** was obtained as a white powder (5.9 g, 98%), and the physical and spectroscopic data were consistent with those reported previously[1]. m.p.: 188-189 °C; <sup>1</sup>H NMR (400 MHz, Methanol-*d*<sub>4</sub>) δ 9.69 (s, 1H), 7.86 (s, 1H), 7.39 (s, 1H), 5.52 (s, 1H).

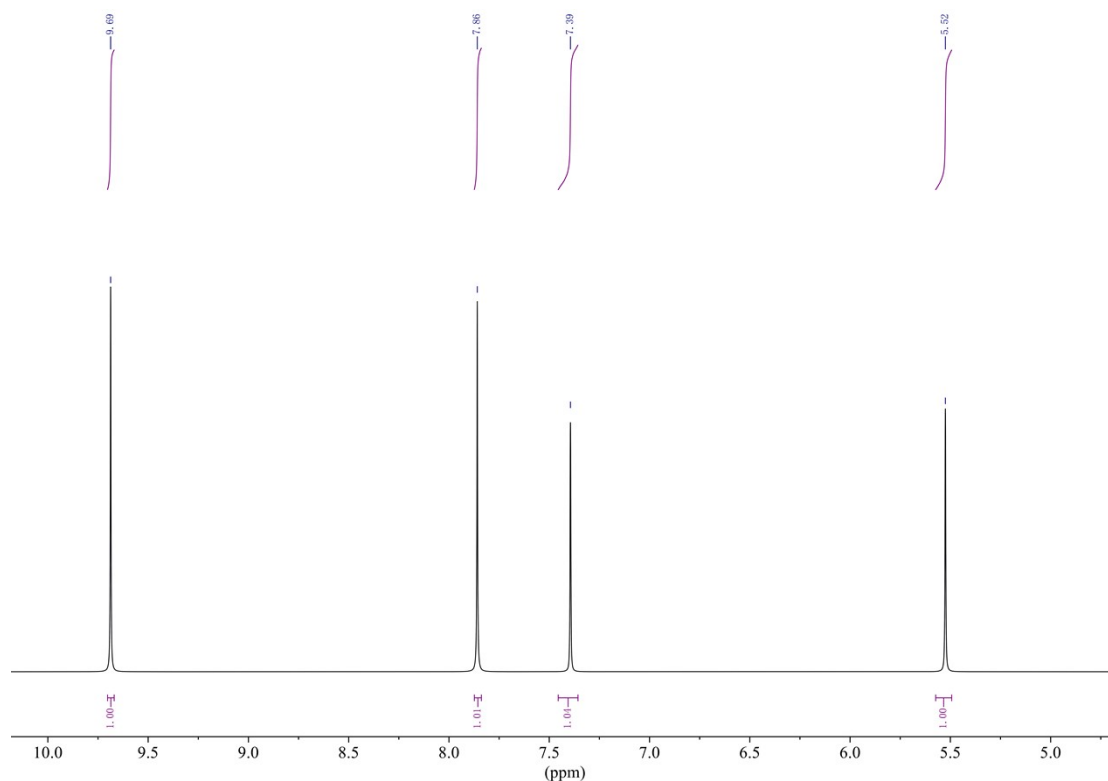

**Fig.S2** <sup>1</sup>H-NMR spectrum of 3,5-dibromo-2,4-dihydroxybenzene-1-carbaldehyde (II)

**(2) 2,4-dihydroxy-3,5-dimethoxybenzene-1-carbaldehyde (III, CAS:182427-46-9)**

CuCl (0.5 g, 5 mmol) and NaOMe (21.6 g, 400 mmol) was added to solution of II (11.8 g, 40 mmol) dissolved in anhydrous methanol and anhydrous dimethylformamide (70 mL, 2:5). The reaction mixture was heated at reflux at 100°C for 4 hours. The solvent was then evaporated in vacuum, distilled water (50 mL) was added and the pH was adjusted to 2 by concentrated HCl. After 15 min, the reaction mixture was transferred to a separatory funnel and the product was extracted with chloroform (5 × 20 mL). The organic layer was washed with brine, dried over MgSO<sub>4</sub>, filtered and the solvent was evaporated in vacuum. Compound **III** was obtained as a brown solid (5.5 g, 70%) with physical and spectroscopic data consistent with those previously reported[1]. m.p.: 88-89 °C; <sup>1</sup>H NMR (400 MHz, DMSO-*d*<sub>6</sub>) δ 10.45 (s, 1H), 10.10 (s, 1H), 9.95 (s, 1H), 7.00 (s, 1H), 3.76 (d, *J* = 16.0 Hz, 6H).

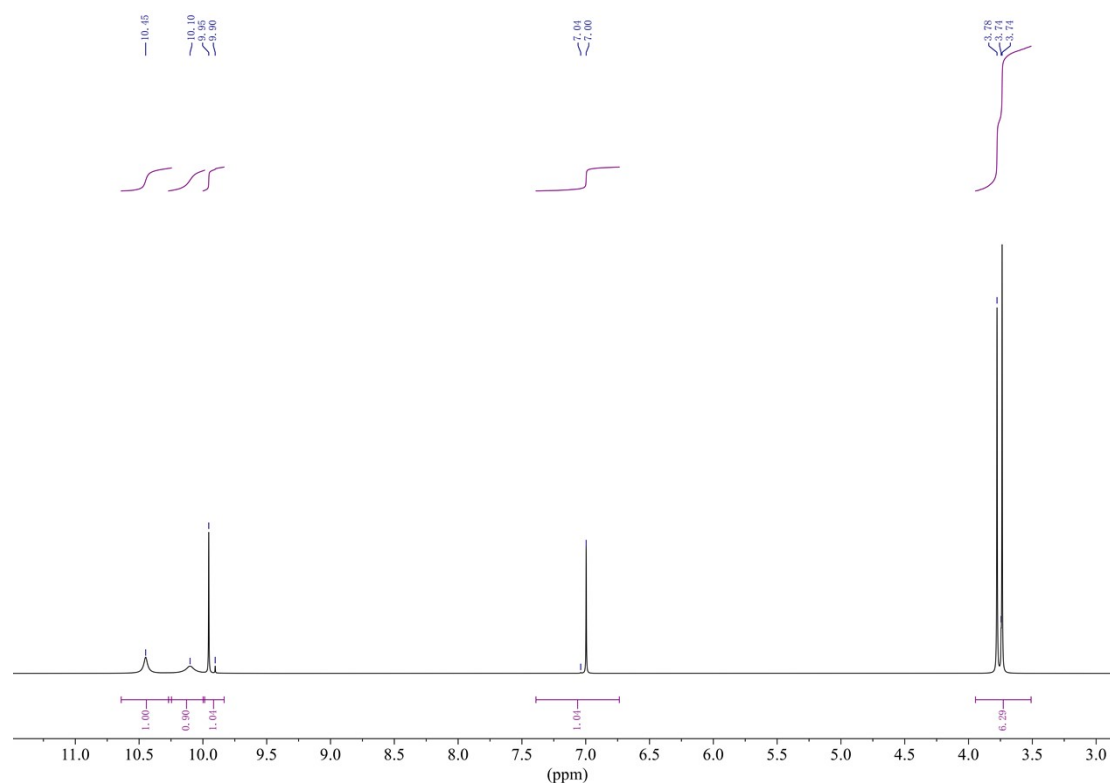

**Fig. S3** <sup>1</sup>H-NMR spectrum of 2,4-dihydroxy-3,5-dimethoxybenzene-1-carbaldehyde (III)

**(3) 4-(2,5-dioxahex-1-yloxy)-2-hydroxy-3,5-dimethoxybenzene-1-carbaldehyde (IV)**

DIPEA (12.50 mL, 72.3 mmol) was added dropwise to compound III (14.31 g, 72.3 mmol) in DCM (100 mL) at  $-5^{\circ}\text{C}$  over 5 minutes. The following mixture was stirred for 5 minutes before 2-methoxyethoxymethyl chloride (8.20 mL, 72.3 mmol) was added. The solution was stirred at  $-5^{\circ}\text{C}$  for 6 hours. Water (50mL) was applied to quench the reaction and extracted with DCM ( $3 \times 100$  mL) at  $0^{\circ}\text{C}$ , dried over anhydrous  $\text{MgSO}_4$ , filtered and concentrated in vacuum to obtain a yellow oil[2]. Flash purification chromatography (ethyl acetate/hexane 50%) yielded compound **IV** (14.9 g, 91%) as a colorless oil.  $^1\text{H}$  NMR (600 MHz, Deuterium Oxide)  $\delta$  12.41 (s, 1H), 12.36 (s, 1H), 9.26 (s, 1H), 7.45 (s, 2H), 6.07 – 6.03 (m, 2H), 5.99 (d,  $J = 8.3$  Hz, 6H), 5.70 – 5.65 (m, 3H), 5.46 (d,  $J = 1.1$  Hz, 2H).

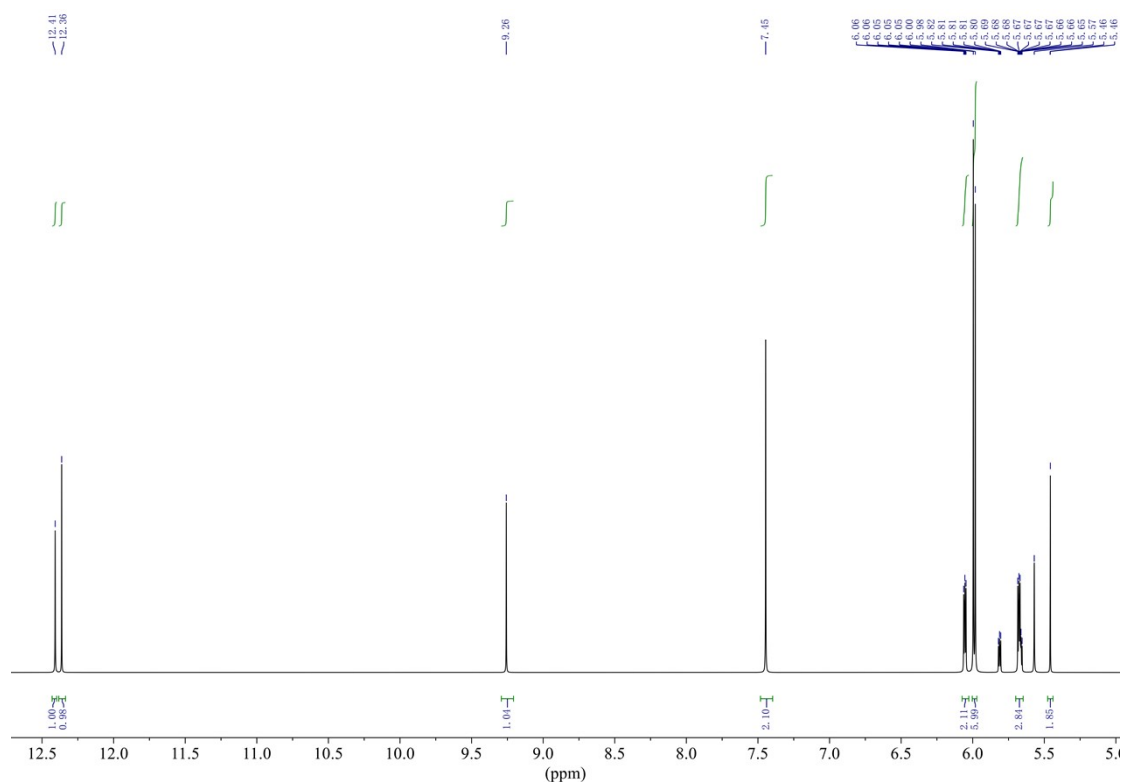

**Fig.S4**  $^1\text{H}$ -NMR spectrum of 4-(2,5-dioxahex-1-yloxy)-2-hydroxy-3,5-dimethoxybenzene-1-carbaldehyde (IV)

**(4) 4-(2,5-dioxahex-1-yloxy)-3,5-dimethoxy-2-(prop-2-ynyloxy)benzene-1-carbaldehyde (V)**

Compound IV (2.86 g, 10 mmol) was dissolved in 5 mL of DMF and anhydrous  $K_2CO_3$  (12.0 mmol) were added to the solution at room temperature. It was then stirred for 20 minutes, propargyl bromide (11.0 mmol) was added, and the mixture was stirred at 45°C for 6 hours. After the reaction was completed, it was extracted with ethyl acetate (30 mL), the organic phase was washed with water (3×50 mL), and then dried over  $MgSO_4$ . Removal of the solvent yielded compound V[3]. m.p.: 101-130°C  $^1H$  NMR (400 MHz,  $DMSO-d_6$ )  $\delta$  10.23 (s, 1H), 7.08 (s, 1H), 5.24 (s, 2H), 4.86 (d,  $J = 2.4$  Hz, 2H), 3.94 – 3.79 (m, 8H), 3.64 (t,  $J = 2.4$  Hz, 1H), 3.50 – 3.42 (m, 2H), 3.23 (s, 3H).

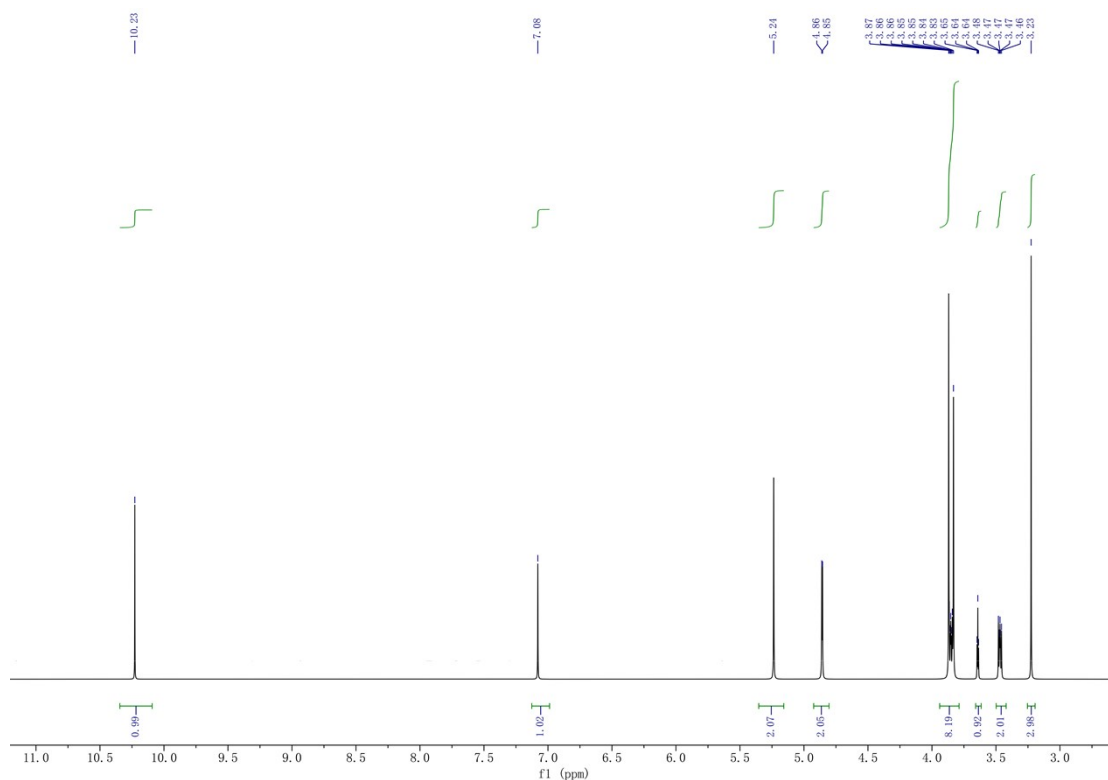

**Fig.S5**  $^1H$ -NMR spectrum of 4-(2,5-dioxahex-1-yloxy)-3,5-dimethoxy-2-(prop-2-ynyloxy)benzene-1-carbaldehyde (V)

**(5) ethyl (2E)-3-[4-(2,5-dioxahex-1-yloxy)-3,5-dimethoxy-2-(prop-2-ynyloxy)phenyl]prop-2-enoate (VI)**

NaH (300 mg, 7.50 mmol) was added to a solution of triethylphosphonoacetate solution (1.68 g, 7.50 mmol) in dried and degassed THF (20 mL) under a nitrogen atmosphere at -5°C. After stirring the mixed solution for 20 minutes, compound V (1.32g, 5.00mmol) was added. After the mixed solution was stirred for 20 minutes, compound 5 dissolved in THF (1.32 g, 5.00 mmol) was added dropwise. After the reaction is completed, 25 mL of distilled water was added. The aqueous layer was separated, then 25 mL of saturated sodium bicarbonate solution was added, to collect the organic layer. Then methyl tert-butyl ether (3 × 30 mL) was added to extract the aqueous layer, and the collected organic layer was dried over anhydrous sodium sulfate overnight[4]. The organic layer was then filtered, the solvent was evaporated under reduced pressure, and compound VI was collected by column chromatography (1.28 mg, 90%) as a white solid. m.p.: 90-98°C. <sup>1</sup>H NMR (600 MHz, Chloroform-*d*) δ 8.02 (d, *J* = 16.1 Hz, 1H), 6.82 (s, 1H), 6.41 – 6.36 (m, 1H), 5.25 (s, 2H), 4.71 (d, *J* = 2.3 Hz, 2H), 4.27 (q, *J* = 7.1 Hz, 2H), 3.99 – 3.95 (m, 2H), 3.90 (d, *J* = 1.1 Hz, 3H), 3.84 (s, 3H), 3.59 – 3.55 (m, 2H), 3.37 (d, *J* = 1.1 Hz, 3H), 2.49 (q, *J* = 1.9, 1.3 Hz, 1H), 1.36 – 1.32 (m, 3H).

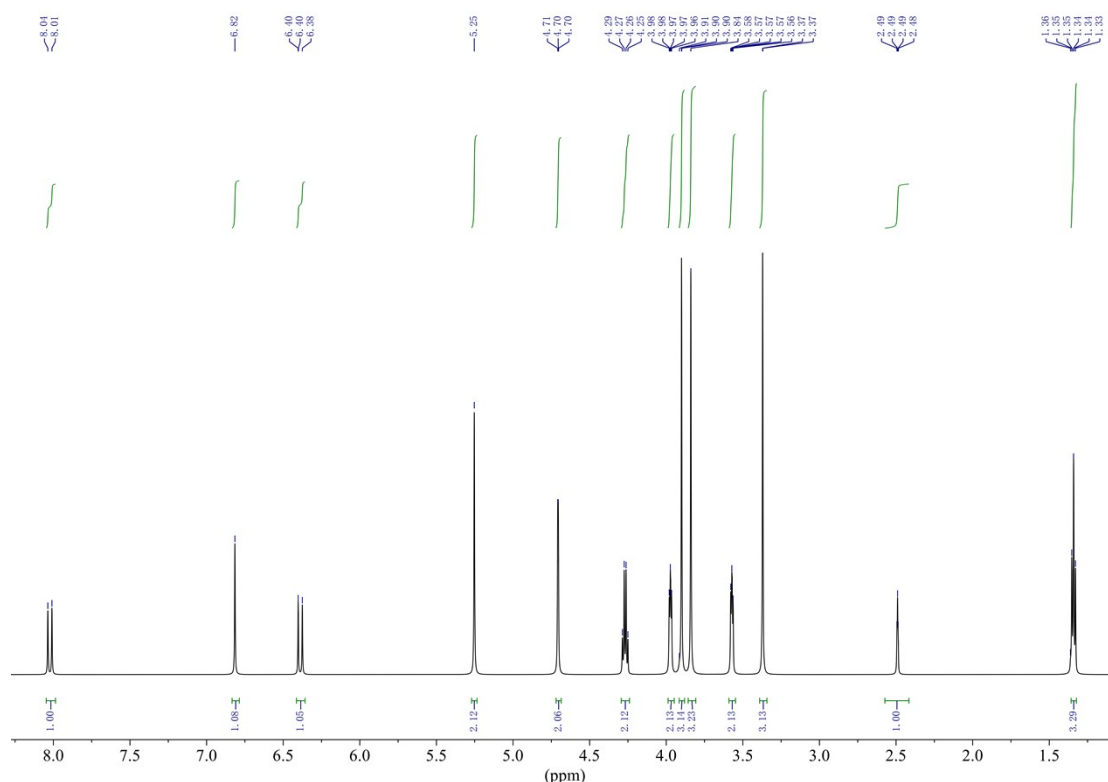

**Fig.S6** <sup>1</sup>H-NMR spectrum of ethyl (2E)-3-[4-(2,5-dioxahex-1-yloxy)-3,5-dimethoxy-2-(prop-2-ynyloxy)phenyl]prop-2-enoate (VI)

**(6) ethyl (2E)-3-[4-hydroxy-3,5-dimethoxy-2-(prop-2-ynyloxy)phenyl]prop-2-enoate (VII)**

Trifluoroacetic acid (0.6 ml) was added to compound VI (19.7 mg, 0.05 mmol) in CH<sub>2</sub>Cl<sub>2</sub> (0.6 ml) at 0 °C under Ar atmosphere. After stirring continuously for 24 hours at room temperature, the solvent was evaporated, and the residue was purified by chromatography with CH<sub>2</sub>Cl<sub>2</sub>-EtOAc (1:1) to obtain compound **VII** (15.4 mg, 90%) as a white solid[5]. m.p.: 88-93 °C <sup>1</sup>H NMR (600 MHz, DMSO-*d*<sub>6</sub>) δ 9.49 (s, 1H), 7.88 (d, *J* = 16.1 Hz, 1H), 7.12 (s, 1H), 6.55 (d, *J* = 16.0 Hz, 1H), 4.72 (d, *J* = 2.5 Hz, 2H), 4.17 (q, *J* = 7.1 Hz, 2H), 3.82 (s, 3H), 3.76 (s, 3H), 3.54 (t, *J* = 2.4 Hz, 1H), 1.25 (t, *J* = 7.1 Hz, 3H).

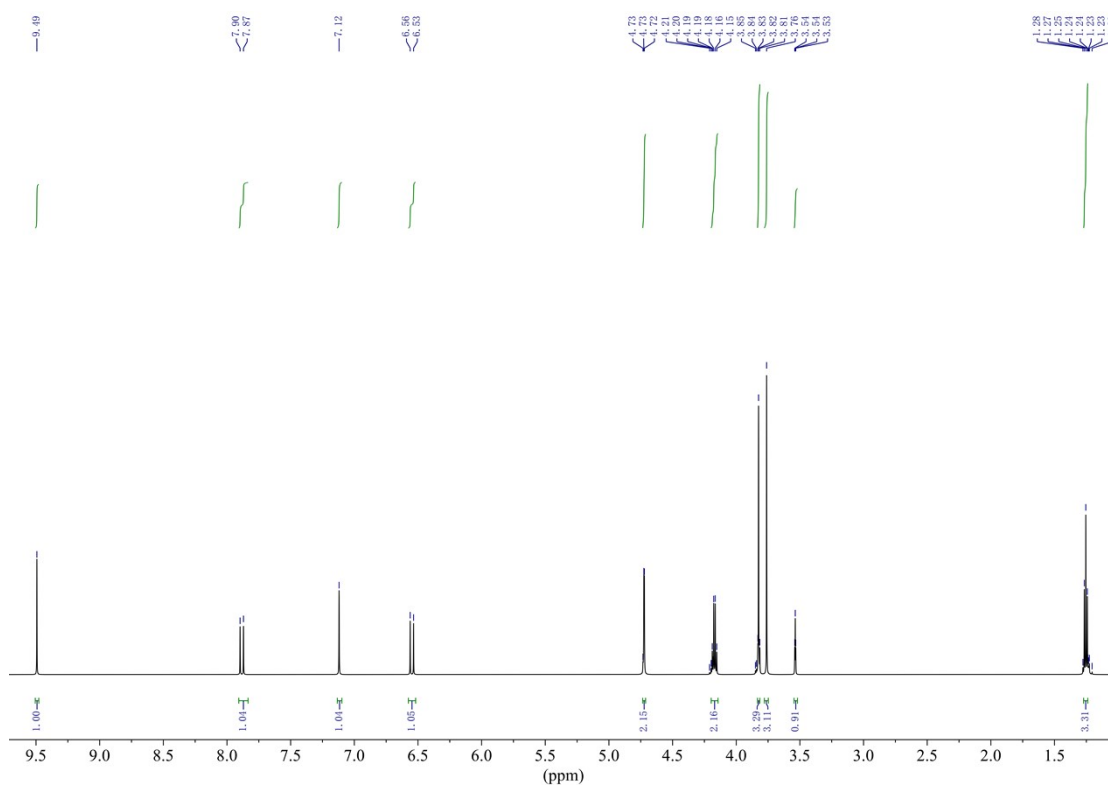

**Fig.S7** <sup>1</sup>H-NMR spectrum of ethyl (2E)-3-[4-hydroxy-3,5-dimethoxy-2-(prop-2-ynyloxy)phenyl]prop-2-enoate (VII)



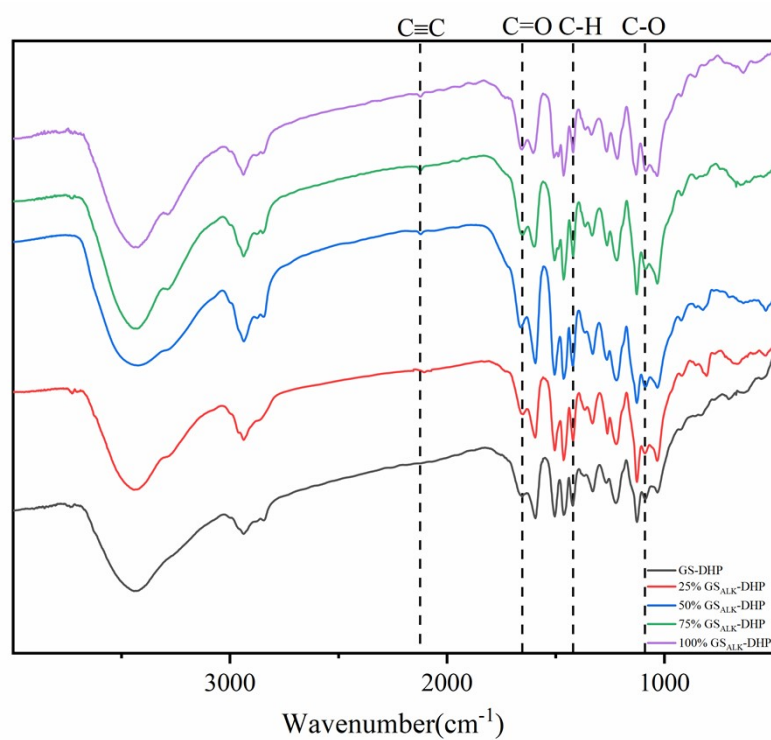

Fig. S9 Infrared spectra of Dehydrogenation Polymers (DHPs) with varying compositions.

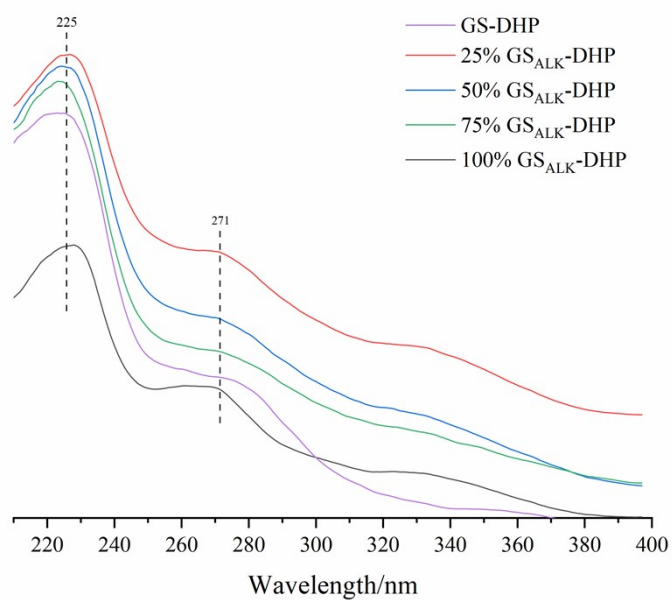

Fig. S10 Ultraviolet (UV) spectra of Dehydrogenation Polymers (DHPs) with different monomer ratios.

---

## References

- [1] Silva A, Benelkebir H, Lopes R, Lopes C, Ganesan A. Total Synthesis of Altissimacoumarin D, a Small Molecule Sirtuin1 Activator. *J Brazil Chem Soc* 2018. <https://doi.org/10.21577/0103-5053.20180021>.
- [2] Nandy JP, Rakic B, Sarma BVNB, Babu N, Lefrance M, Enright GD, et al. Benzofuran-Derived Cyclic  $\beta$ -Amino Acid Scaffold for Building a Diverse Set of Flavonoid-Like Probes and the Discovery of a Cell Motility Inhibitor. *Org Lett* 2008;10:1143–6. <https://doi.org/10.1021/ol800050g>.
- [3] Keskin S, Balci M. Intramolecular Heterocyclization of *O*-Propargylated Aromatic Hydroxyaldehydes as an Expedient Route to Substituted Chromenopyridines under Metal-Free Conditions. *Org Lett* 2015;17:964–7. <https://doi.org/10.1021/acs.orglett.5b00067>.
- [4] Schmidt B, Riemer M. ChemInform Abstract: Synthesis of Allyl- and Prenylcoumarins via Microwave-Promoted Tandem Claisen Rearrangement/Wittig Olefination. *ChemInform* 2016;47:chin.201624151. <https://doi.org/10.1002/chin.201624151>.
- [5] Matsuya Y, Kawaguchi T, Nemoto H. New Strategy for the Total Synthesis of Macrophelides A and B Based on Ring-Closing Metathesis. *Org Lett* 2003;5:2939–41. <https://doi.org/10.1021/ol0350689>.
- [6] Fernandes N, Ferreira MA. Does international cross-listing improve the information environment. *J Financ Econ* 2008;88:216–44. <https://doi.org/10.1016/j.jfineco.2007.06.002>.
